# Supplementary material for: Clustered mutations in hominid genome evolution are consistent with APOBEC3G enzymatic activity
Source: HighWire-hosted journal article supplement (doi:10.1101/gr.199240.115), 2016-04-07
Supplement: Supp_TablesS1-S4.xlsx [file Supp_TablesS1-S4.xlsx]

## Sheet: Supplemental Table S1
Clusters length distribution for the different clusters' p-values in the Homo lineage.
cluster's p.value	<=1			<=0.01			<=0.001			<=0.0001
cluster legnth	c	g	total	c	g	total	c	g	total	c	g	total
2	113413	113867	227280	-	-	-	-	-	-	-	-	-
3	7657	7800	15457	7654	7797	15451	245	252	497	-	-	-
4	548	528	1076	548	528	1076	539	515	1054	35	27	62
5	55	45	100	55	45	100	55	45	100	51	45	96
6	6	4	10	6	4	10	6	4	10	6	4	10
Expected and Observed number of C- or G- coordinated clusters
	Expected*	Observed	Fisher's p
# of C- or G- coordinated clusters	225559	243923	2.249e-178
*The expected number of clusters was calculated by the chance of a cluster to have all it's mutations derived from C or G ancestral nucleotide.

## Sheet: Supplemental Table S2
Lineage	Mutations in A3G set	in CC	in CCC	in CCCA	in CCCC	in CCCG	in CCCT
Homo lineage	13011	6676	4790	1080	902	1877	931
Ancestral Hominin	5396	2746	1893	471	470	553	489
Homo sapiens	1337	854	702	175	147	201	179
Neanderthal	1406	868	724	175	160	214	175
Denosiva	1415	883	735	153	165	229	188
Chimpanzee	14032	7161	5083	1197	922	1887	1077
Total	36597	19188	13927	3251	2766	4961	3039

## Sheet: Supplemental Table S3
Lineage	Mutations in A3G set
	C-to-A	C-to-G	C-to-T	Total
Homo lineage	1729	1894	9388	13011
Ancestral Hominin	789	904	3703	5396
Homo sapiens	180	219	938	1337
Neanderthal	203	247	956	1406
Denosiva	185	238	992	1415
Chimpanzee	1797	2110	10125	14032
Total	4883	5612	26102	36597

## Sheet: Supplemental Table S4
Gene symbol	Chromosome	Coordinate	End state	Ancestral state
KIF17	1	20992819	G	C
AIM1L	1	26671669	A	G
AIM1L	1	26671690	A	G
ERICH3	1	75037045	T	C
ERICH3	1	75037079	G	C
ERICH3	1	75037120	T	C
OLFML2B	1	161968004	C	G
OLFML2B	1	161968055	A	G
RBP3	10	48388101	A	G
RBP3	10	48388183	T	G
KIAA1549L	11	33564013	G	C
SLC22A12	11	64366047	A	G
TMPRSS13	11	117785217	T	C
RAD52	12	1023638	A	G
RAD52	12	1023678	C	G
KL	13	33590652	G	C
CEMP1	16	2580857	T	C
CEMP1	16	2580893	T	C
CEMP1	16	2580912	T	C
C16orf58	16	31504301	T	C
MYBBP1A	17	4446227	T	G
SMTNL2	17	4497137	T	C
ALOX12	17	6899521	A	G
RNF213	17	78350194	G	C
MADCAM1	19	501719	T	C
MADCAM1	19	501743	T	C
MADCAM1	19	501762	A	C
MADCAM1	19	501801	A	C
PLIN4	19	4512720	T	C
PLIN4	19	4512765	T	C
PLIN4	19	4512789	T	C
PLIN4	19	4512824	T	C
PLIN4	19	4512870	T	C
CATSPERG	19	38845358	A	G
SCAF1	19	50154904	A	C
SIGLEC8	19	51961215	T	C
OBSL1	2	220422808	A	G
PCK1	20	56139440	T	C
SLC12A8	3	124837684	T	C
AHSG	3	186331142	A	G
KIAA1211	4	57181561	A	C
KIAA1211	4	57181632	G	C
IBSP	4	88732746	A	G
IBSP	4	88732763	A	G
IBSP	4	88732779	C	G
SPACA1	6	88769180	A	G
SPACA1	6	88769217	A	G
EEPD1	7	36324395	T	C
EPPK1	8	144941430	T	C
PCSK5	9	78911707	A	G
PCSK5	9	78911733	A	G
